# Supplementary material for: Development of ASAS quality standards to improve the quality of health and care services for patients with axial spondyloarthritis
Source: PubMed Central journal article supplement — Ann Rheum Dis. 2019 Oct 11;79(2):193–201. doi: 10.1136/annrheumdis-2019-216034 (PMC7025729; doi:10.1136/annrheumdis-2019-216034), 2019-10-11
Supplement: annrheumdis-2019-216034supp001.pdf [file annrheumdis-2019-216034supp001.pdf]

| No | Domain Structure                                                                                                                          | Agreement (%), n=140 | Misunderstanding* (%) | Prioritization, NRS (0-10), Mean (SD), [Range] | Prioritization ≥8 (%) |
|----|-------------------------------------------------------------------------------------------------------------------------------------------|----------------------|-----------------------|------------------------------------------------|-----------------------|
| 1  | Access to health care                                                                                                                     | 92.9                 | 0.7                   | 7.7 (1.7) [1-9]                                | 69.2                  |
| 2  | Availability of specific care                                                                                                             | 89.4                 | 7.1                   | 6.2 (2.7) [0-9]                                | 40                    |
| 3  | Existence of local specialist referral center                                                                                             | 87.9                 | 0.7                   | 7.2 (2.0) [0-9]                                | 54.2                  |
| 4  | Rapid access                                                                                                                              | 82.3                 | 2.1                   | 6.7 (2.0) [0-9]                                | 40                    |
| 5  | Training on how to calculate scores                                                                                                       | 80.1                 | 2.8                   | 6.0 (2.6) [0-9]                                | 34.2                  |
| 6  | Interaction between community                                                                                                             | 76.6                 | 2.8                   | 6.2 (2.2) [0-9]                                | 30.0                  |
| 7  | Structure of that setting                                                                                                                 | 77.3                 | 1.4                   | 5.2 (2.6) [0-9]                                | 18.3                  |
| 8  | Structural support for physiotherapist - led exercise                                                                                     | NA                   | NA                    | 5.7 (2.5) [0-9]                                | 23.3                  |
| No | Domain Process                                                                                                                            | Agreement (%), n=140 | Misunderstanding (%)  | Prioritization, NRS (0-10),                    | Prioritization ≥8 (%) |
| 1  | Assessment of disease activity                                                                                                            | 92.1                 | 2.1                   | 8.6 (1.8) [1-10]                               | 80.2                  |
| 2  | Assessment of disease status                                                                                                              | 92.1                 | 2.1                   | 8.0 (2.2) [1-10]                               | 69.0                  |
| 3  | Patient information (e.g. about their disease. its treatment and managing, specifically smoking cessation, exercise and orthotics advice) | 92.1                 | 0.7                   | 8.5 (1.9) [2-10]                               | 78.4                  |
| 4  | Timely diagnosis (e.g. such as time of GP referral or time to diagnosis after first visit to a specialized center)                        | 89.3                 | 1.4                   | 8.6 (1.6) [4-10]                               | 81.9                  |
| 5  | Assessment of physical function (such as BASFI)                                                                                           | 88.6                 | 2.1                   | 7.9 (1.8) [2-10]                               | 69.8                  |
| 6  | Assessment of infections in                                                                                                               | 87.9                 | 4.3                   | 8.5 (1.9)                                      | 75.9                  |

|    |                                                                                                                |      |     |                     |      |
|----|----------------------------------------------------------------------------------------------------------------|------|-----|---------------------|------|
|    | patients starting on biologics                                                                                 |      |     | [2-10]              |      |
| 7  | Treatment plan provision                                                                                       | 87.1 | 2.1 | 8.0 (2)<br>[2-10]   | 69.0 |
| 8  | Assessment of comorbidities                                                                                    | 85.7 | 8.6 | 8.1 (2)<br>[2-10]   | 72.4 |
| 9  | Documentation of diagnosis                                                                                     | 85.7 | 2.1 | 8.5 (2)<br>[2-10]   | 81.0 |
| 10 | Assessment of radiographic damage                                                                              | 85.0 | 0.7 | 7.8 (2.1)<br>[1-10] | 66.4 |
| 11 | Time between diagnosis and the initiation of appropriate therapy                                               | 85.0 | 0.7 | 8.0 (2)<br>[0-10]   | 70.7 |
| 12 | Assessment of symptoms                                                                                         | 82.9 | 2.1 | 8.0 (1.8)<br>[4-10] | 69.8 |
| 13 | Assessment of mobility                                                                                         | 82.9 | 2.1 | 8.0 (2.0)<br>[0-10] | 62.9 |
| 14 | Involvement of patients into decision                                                                          | 82.9 | 1.4 | 8.3 (2.0)<br>[1-10] | 74.1 |
| 15 | Assessment of work status                                                                                      | 82.1 | 0.7 | 7.4 (2.4)<br>[0-10] | 62.9 |
| 16 | Assessment of other patient-reported outcomes                                                                  | 79.3 | 0.7 | 7.3 (2.3)<br>[0-10] | 62.1 |
| 17 | Patient receiving a structured education                                                                       | 78.6 | 2.1 | 7.2 (2.4)<br>[0-10] | 50.9 |
| 18 | % of axSpA patients who have been seen within 12 weeks for assessment of response after the start of biologics | 77.1 | 2.9 | 7.7 (2.3)<br>[0-10] | 61.2 |
| 19 | Frequency of follow-up visits                                                                                  | 72.9 | 2.1 | 6.5 (2.4)<br>[0-10] | 38.8 |

|           |                                                                                                                              |                        |                              |                                                       |                                               |
|-----------|------------------------------------------------------------------------------------------------------------------------------|------------------------|------------------------------|-------------------------------------------------------|-----------------------------------------------|
| 20        | % of axSpA patients who have been seen every 6 months on NSAIDs                                                              | 65.7                   | 2.9                          | 6.1 (2.7)<br>[0-10]                                   | 35.4                                          |
| 21        | % of axSpA patients who have been seen every 3 months on biologics                                                           | 64.3                   | 2.9                          | 6.6 (2.8)<br>[0-10]                                   | 48.3                                          |
| 22        | Assessment of morphometric assessments                                                                                       | 45.0                   | 26.4                         | 5.7 (2.4)<br>[0-10]                                   | 25.9                                          |
| 23        | % of axSpA patients who have been seen one month after 1st visit                                                             | 43.6                   | 5.7                          | 5.4 (3.1)<br>[0-10]                                   | 28.4                                          |
| 24        | Extra-articular manifestation                                                                                                | NA                     | NA                           | 8.1 (1.9)<br>[2-10]                                   | 72.4                                          |
| 25        | Assessment of current treatment                                                                                              | NA                     | NA                           | 7.6 (1.9)<br>[1-10]                                   | 56.0                                          |
| <b>No</b> | <b>Domain Outcome</b>                                                                                                        | <b>Agreement (%)</b> , | <b>Misunderstanding* (%)</b> | <b>Prioritization, NRS (0-10), Mean (SD), [Range]</b> | <b>Prioritization <math>\geq 8</math> (%)</b> |
| 1         | % of axSpA patients with high disease activity at treatment start and low disease activity after 3 months of treatment start | 77.1                   | 2.9                          | 8.0 (2.1)<br>[0-10]                                   | 64.7                                          |
| 2         | % of axSpA patients who are being employed if age $\leq 65$ years                                                            | 65.7                   | 3.6                          | 7.0 (2.0)<br>[0-10]                                   | 47.4                                          |
| 3         | % of axSpA patients receiving corrective osteotomy                                                                           | 49.3                   | 15.0                         | 4.5 (3.0)<br>[0-10]                                   | 16.4                                          |
| 4         | % of axSpA patients receiving total arthroplasty                                                                             | 35.0                   | 13.6                         | 5.2 (2.8)<br>[0-10]                                   | 18.1                                          |
| 5         | % of axSpA patients who improved in mobility as measured by physiotherapists                                                 | NA                     | NA                           | 6.6 (2.6)<br>[0-10]                                   | 43.1                                          |

|   | tests                                         |    |    |                     |      |
|---|-----------------------------------------------|----|----|---------------------|------|
| 6 | % hospital admissions for complicated disease | NA | NA | 6.4 (2.9)<br>[0-10] | 43.1 |

\*Definition of misunderstanding: Each participant was asked whether they fully understood the explanation to and the phrasing of the key area provided. Participants had the possibility to agree or disagree. Participants were educated about the intention of the project and received instructions prior to responding to the questionnaire.

### **Supplement 1 :Key area for quality improvement Votes of 1<sup>st</sup> round**
